# Supplementary material for: Vascular control of the CO2/H+-dependent drive to breathe
Source: eLife. 2020 Sep 14;9:e59499. doi: 10.7554/eLife.59499 (PMC7521922; doi:10.7554/eLife.59499)
Supplement: Figure 1—source data 1. [file elife-59499-fig1-data1.xlsx]

## Sheet: Sheet1
Source Data: Figure 1
Fig. 1A	Endothelial Cells (TekCre::TdTomato) Log2(fold change)
	Gene Name	RTN			cNTS			ROb
	P2rx4	2.8558	1.51108	1.86263	3.07131	0.918216	1.54423	0.172636	0.207827	0.327162
	P2rx7	1.95527	0.116091	0.888123	-0.0178388	0.727459	-0.12723	0.0427653	-0.174638	0.512731
	P2ry1	0.463192	-1.08145	-2.76124	0.151473	0.868712	0.123871	-0.863523	0.481573	-1.40955
	P2ry2	-8.74809	-9.86253	-9.04703	-9.05981	-9.65142	-8.92878	-0.554632	-0.47654	-0.315144
	P2ry6	2.44826	-2.46252	1.69432	2.70805	3.52579	2.17027	2.51955	1.97973	2.29485
	P2ry12	-0.142927	0.610558	0.125505	-0.14278	0.3165	0.295289	1.6566	1.48315	1.57624
	P2ry13	0.63683	1.63359	0.830551	1.50654	1.31536	0.352489	1.64314	1.98105	1.22804
	P2ry14	-1.83775	-4.45727	-1.33597	-4.83873	-3.38851	-1.21772	0.823882	-1.10056	-2.28643
Fig. 1B	Smooth Muscle Cells (Myh11Cre/eGFP) Log2(fold change)
	Gene Name	RTN			cNTS			ROb
	P2rx1	-0.467649	-2.01837	-1.58961	-9.85053	-5.75199	-9.89571	-9.8324	-7.71203	-9.82948
	P2rx4	-2.26394	-0.0414585	-1.52436	-10.3778	-4.28734	-5.8776	-2.97391	-0.0567566	-7.3942
	P2ry2	5.40006	5.20095	9.8525	-2.19633	-4.02026	-4.87565	-0.428327	-1.6384	-2.98979
	P2ry6	-2.05513	-6.57649	-6.58079	-6.68467	-7.1255	-7.0861	-7.30245	-6.43489	-9.85328
	P2ry14	-2.97049	-1.5977	-1.98838	-17.1255	-12.2343	-17.0861	-3.12312	0.248092	-7.96805
Control gene expression profiles
		Endothelial Cells (TekCre::TdTomato)					Smooth Muscle Cells (Myh11Cre/eGFP)
		Gapdh	Rbfox3	Aldh1l1	Acta2	Flt1	Gapdh	Rbfox3	Aldh1l1	Acta2	Flt1
	RTN	20.712	n.d.	n.d.	n.d.	27.962	20.129	n.d.	n.d.	24.078	n.d.
		20.635				27.906	20.072			23.966
		20.768				28.022	20.173			23.908
	cNTS	19.807	n.d.	n.d.	n.d.	28.014	21.047	n.d.	n.d.	23.03	n.d.
		19.802				28.033	21.007			23.098
		19.755				28.024	21.054			26.975
	ROb	19.972	n.d.	n.d.	n.d.	26.17	20.971	n.d.	n.d.	27.059	n.d.
		19.963				26.181	20.899			26.969
		21.675				24.567	20.497			27.26
	Control	21.759	n.d.	n.d.	n.d.	24.573	20.435	n.d.	n.d.	27.401	n.d.
		21.651				24.623	20.405			27.325
		21.782				24.377	20.444			22.61
