# Supplementary material for: Vascular control of the CO2/H+-dependent drive to breathe
Source: eLife. 2020 Sep 14;9:e59499. doi: 10.7554/eLife.59499 (PMC7521922; doi:10.7554/eLife.59499)
Supplement: Figure 4—source data 1. [file elife-59499-fig4-data1.xlsx]

## Sheet: Sheet1
Source Data: Figure 4
Fig. 4a	All Raw Ct values		TaglnCre::TdTomato			TaglnCre::P2ry2fl/fl::TdTomato			TaglnCre::P2ry2fl/fl::TdTomato RTN rescue
	RTN	P2ry2	25.15	25.988	25.729	N.D.	N.D.	N.D.	26.673	25.992	27.182
		GAPDH	20.0323	20.035	20.0911	23.335	23.373	23.001	20.188	19.829	21.281
		Myh11	20.3574	20.2536	20.3141	24.655	24.671	24.666	24.831	24.647	24.898
	Brainstem	P2ry2	30.901	30.822	30.78	N.D.	N.D.	N.D.	28.911	27.841	29.672
		GAPDH	20.053	20.061	20.075	22.34	23.954	23.72	18	19.987	21.002
		Myh11	18.715	19.716	18.822	23.587	23.781	23.793	22.878	23.647	22.638
	Cortex	P2ry2	N.D.	N.D.	N.D.	N.D.	N.D.	N.D.	N.D.	N.D.	N.D.
		GAPDH	17.891	18.41	18.703	23.314	21.686	21.17	19.829	20.01	19.728
		Myh11	18.906	19.346	20.308	23.149	23.336	23.457	22.788	21.983	22.348
