# Supplementary material for: Vascular control of the CO2/H+-dependent drive to breathe
Source: eLife. 2020 Sep 14;9:e59499. doi: 10.7554/eLife.59499 (PMC7521922; doi:10.7554/eLife.59499)
Supplement: Figure 4—source data 2. [file elife-59499-fig4-data2.xlsx]

## Sheet: Sheet1
Source Data: Table 1- Metabolic testing in light and dark cycles of control and P2Y2 cKO mice
	Light Cycle		Dark Cycle						VO2 light cycle		VO2 dark cycle		VO2 in 24 hours
	Control	P2Y2 cKO	Control	P2Y2 cKO					Control	P2Y2 cKO	Control	P2Y2 cKO	Control	P2Y2 cKO
Systolic	101.636	100.824	102.296	104.923					3874.71	3679.24	5392.64	5181.56	4633.68	4430.4
	105.837	108.823	106.123	114.923					3898.78	4214.73	5246.18	5114.27	4572.48	4664.5
	99.7266	110.912	104.872	112.732					4212.51	3899.13	5538.16	5565.84	4875.33	4732.49
Diastolic	71.4978	70.8234	73.5833	71.7238					4092.89	3828.33	5975.53	5381.73	5034.21	4605.03
	73.8348	74.9234	71.7823	73.8234					3786.78	4342.33	4873.22	6111.2	4330	5226.77
	70.7122	72.7123	72.1844	72.8234					4079.6	5202.49	5598.6	7625.84	4839.1	6414.17
									4042.07	3985	6002.33	5868.51	5022.2	4926.76
	Light Cycle		Dark Cycle						3827.6	4469.71	5533.36	6602.02	4680.48	5535.87
	Control	P2Y2 cKO	Control	P2Y2 cKO
	480.591	470.234	504.659	460.823					VCO2 light cycle		VCO2 dark cycle		VCO2 in 24 hours
	475.736	480.923	470.283	466.822					Control	P2Y2 cKO	Control	P2Y2 cKO	Control	P2Y2 cKO
	455.871	470.234	498.762	470.944					3434.4	3399.27	5030.4	4955.04	4232.4	4177.16
									3381.33	3678.62	4858.82	4865.8	4120.08	4272.21
	Systolic Blood Pressure (mmHg)								3803.36	3481.62	5245.53	5348.91	4524.44	4415.27
	Control			P2Y2 cKO					3556.16	3304.51	5624.11	4963.16	4590.13	4133.83
air	123.974	125.823	122.889	122.912	121.019	125.199			3314.42	3888.13	4666.69	5761.58	3990.56	4824.86
0% CO2	123.181	127.923	123.881	121.999	120.112	121.124			3622.96	4474.47	5140.31	7147.33	4381.63	5810.9
3% CO2	114.616	112.923	114.923	113.091	112.924	118.024			3357.22	3437.53	5093.8	5478.4	4225.51	4457.97
5% CO2	130.039	129.923	128.724	131.655	144.914	145.923			3258.91	4103.42	5030.93	6173.31	4144.92	5138.37
7% CO2	135.638	132.823	131.923	136.178	145.059	155.029
									RER light cycle		RER dark cycle		RER in 24 hours
	Diastolic Blood Pressure (mmHg)								Control	P2Y2 cKO	Control	P2Y2 cKO	Control	P2Y2 cKO
	Control			P2Y2 cKO					0.885067	0.921756	0.930933	0.958978	0.908	0.940367
air	86.6822	85.8345	83.9234	88.2321	87.9823	84.0234			0.865756	0.872178	0.921711	0.951622	0.893733	0.9119
0% CO2	80.6867	84.2342	83.7324	81.8235	80.7347	80.2342			0.899889	0.891489	0.947222	0.961467	0.923556	0.926478
3% CO2	74.8646	72.9234	78.9234	75.9235	77.0238	75.0128			0.867933	0.861044	0.937533	0.920822	0.902733	0.890933
5% CO2	88.1494	86.8342	83.2349	88.1928	85.0124	83.1235			0.873933	0.894178	0.956244	0.941022	0.915089	0.9176
7% CO2	92.3473	90.8234	89.9238	91.9024	90.9235	89.1114			0.888267	0.857244	0.917889	0.937778	0.903078	0.897511
									0.827978	0.858867	0.846844	0.934956	0.837411	0.896911
	Heart Rate (beats/min)								0.848956	0.915444	0.905822	0.935311	0.877389	0.925378
	Control			P2Y2 cKO
air	475.609	477.924	467.928	470.918	469.024	455.123
0% CO2	359.333	358.929	367.823	358.019	355.923	333.129
3% CO2	345.708	344.882	345.812	344.486	333.234	311.223
5% CO2	440	441.234	444.823	444.45	441.092	445.019
7% CO2	453.546	452.934	451.019	453.292	455.232	475.013
