# Supplementary figures and images for: Vascular control of the CO2/H+-dependent drive to breathe
Source: eLife journal article supplement (doi:10.7554/elife.59499), 2020-09-14

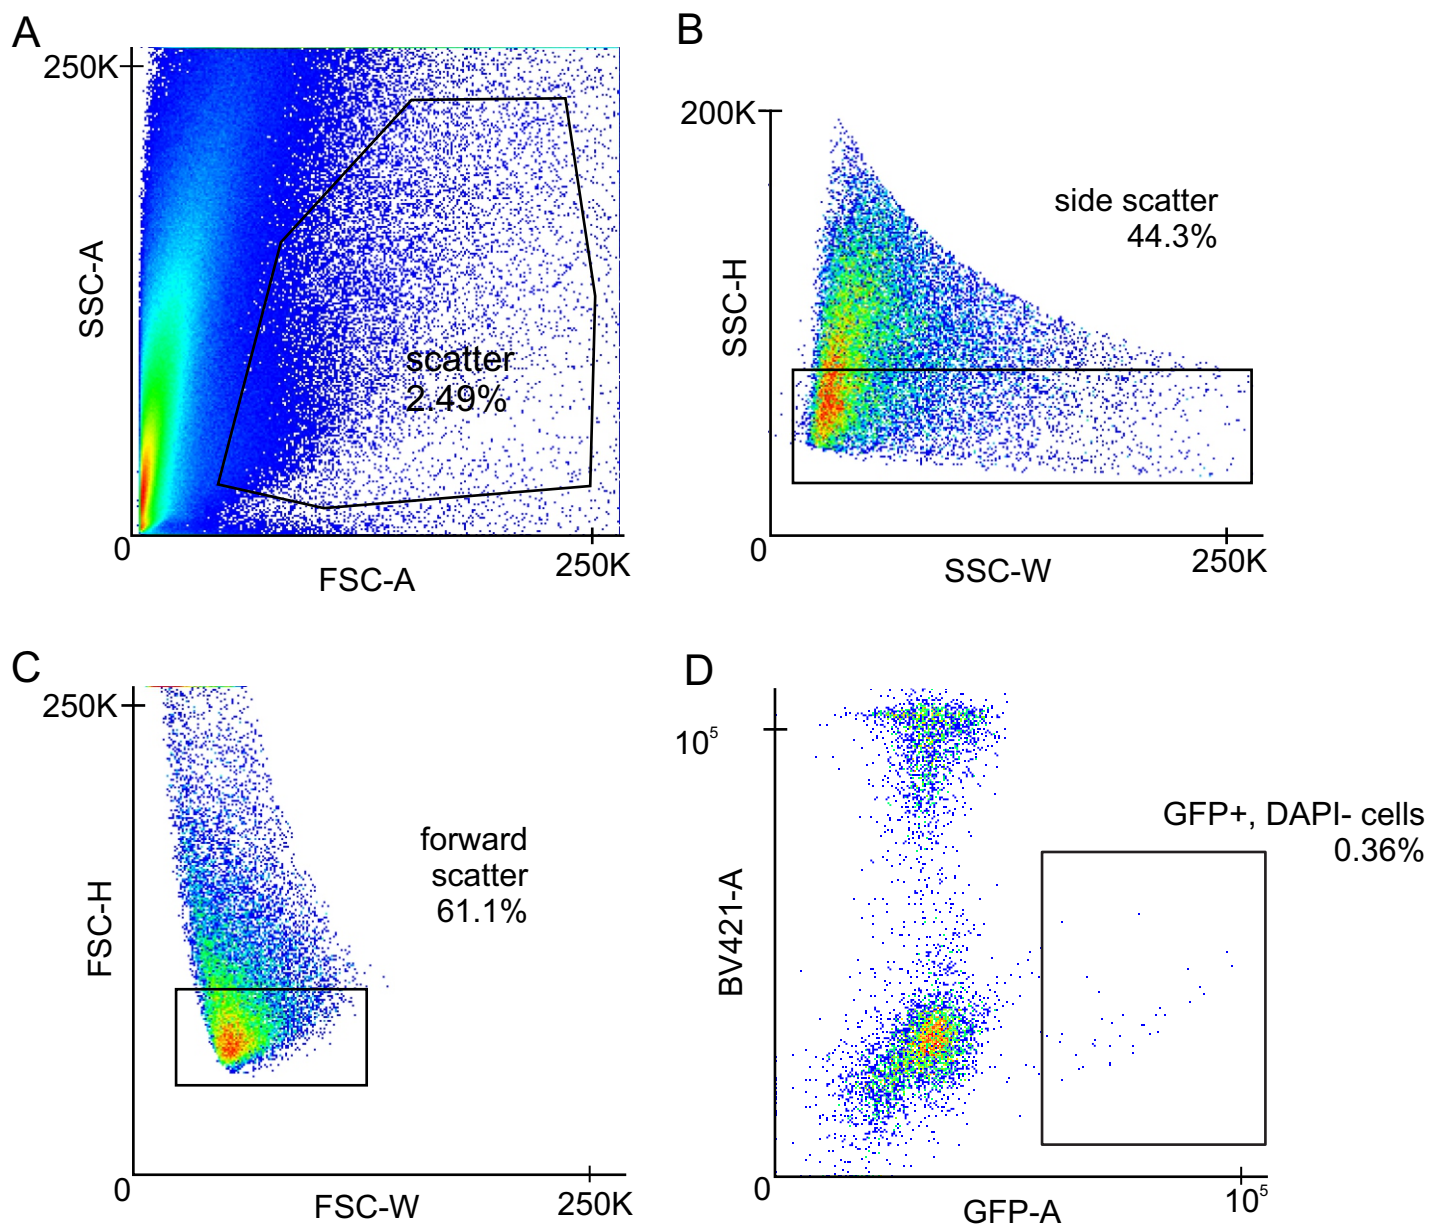

Figure 1 - Figure Supplement 1

Supplement: supp [file elife_poa_e59499_Figure_1_figure_supplement_1.pdf › elife_poa_e59499_Figure_1_figure_supplement_1.pdf]

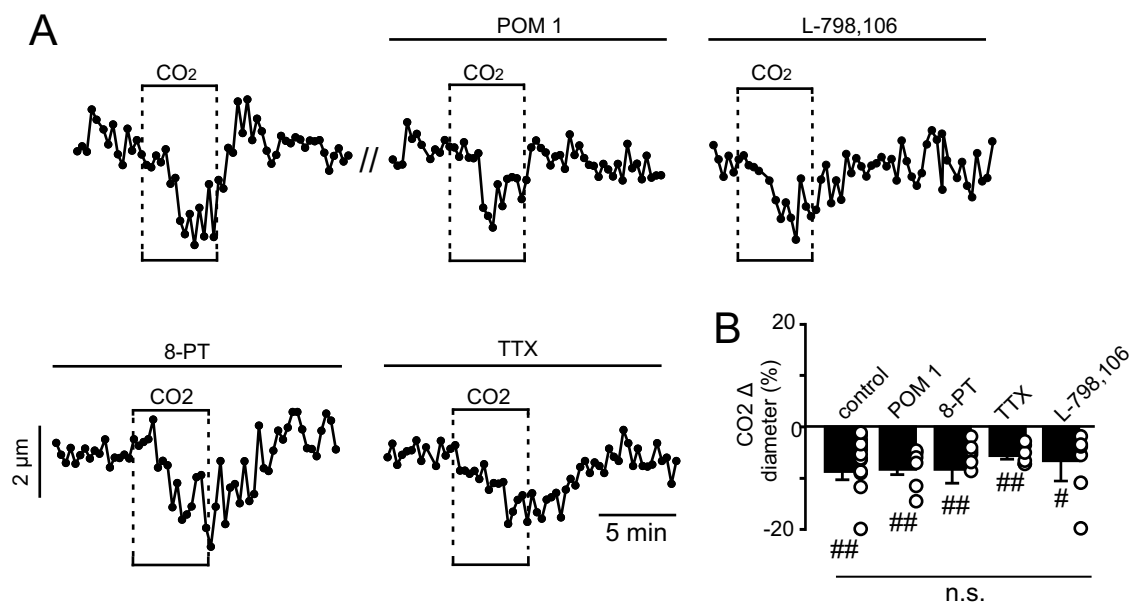

Figure 1 - Figure Supplement 2

Supplement: supp [file elife_poa_e59499_Figure_1_figure_supplement_2.pdf › elife_poa_e59499_Figure_1_figure_supplement_2.pdf]

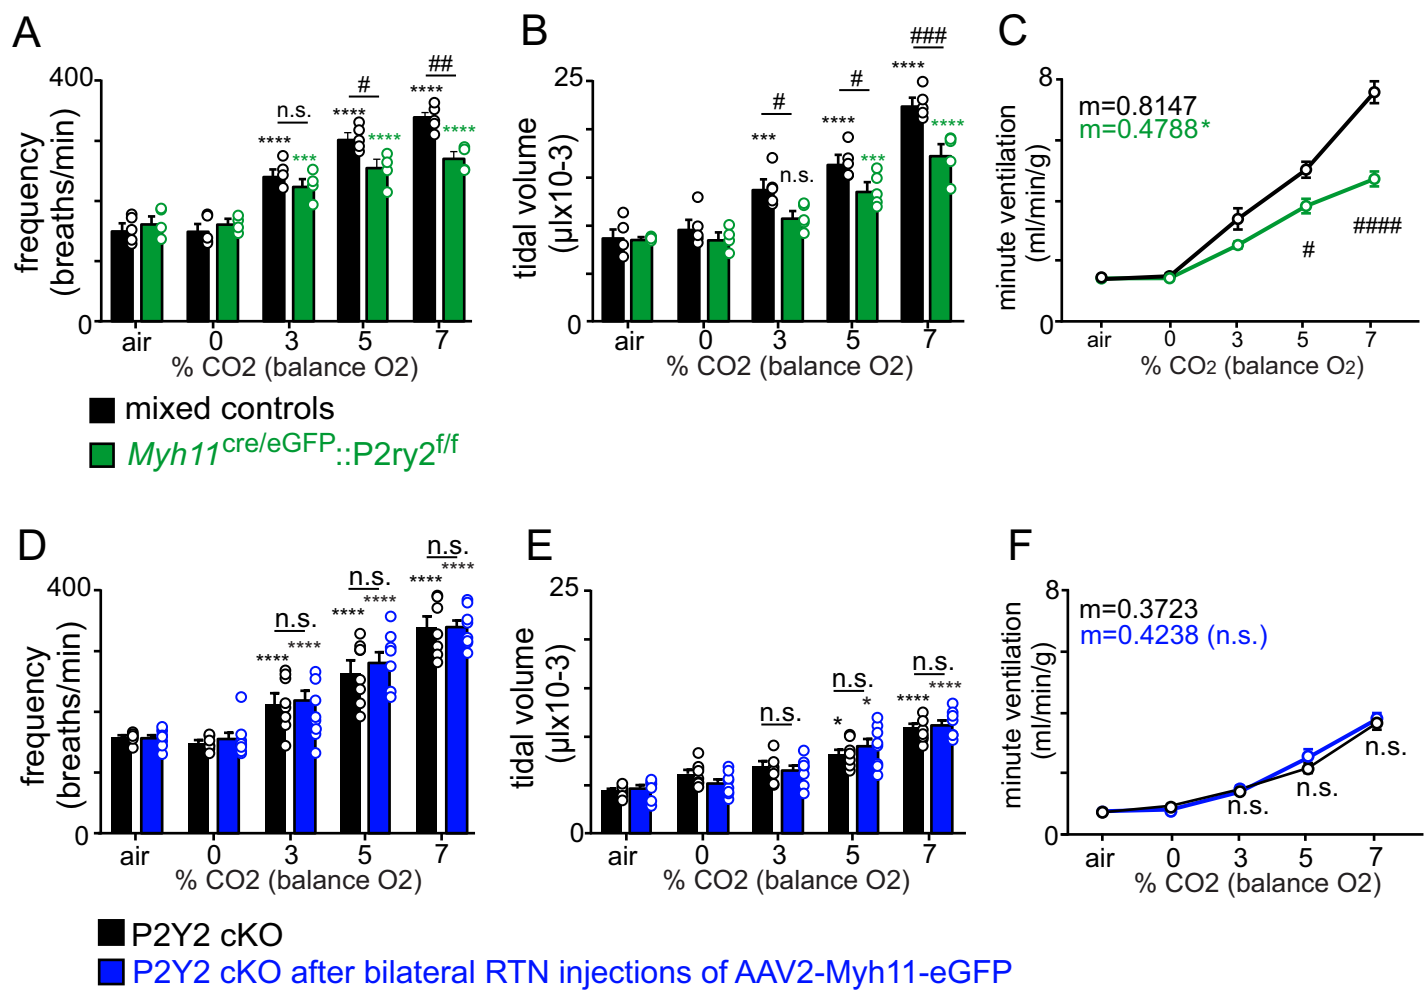

Figure 4- Figure Supplement 1

Supplement: supp [file elife_poa_e59499_Figure_4_figure_supplement_1.pdf › elife_poa_e59499_Figure_4_figure_supplement_1.pdf]

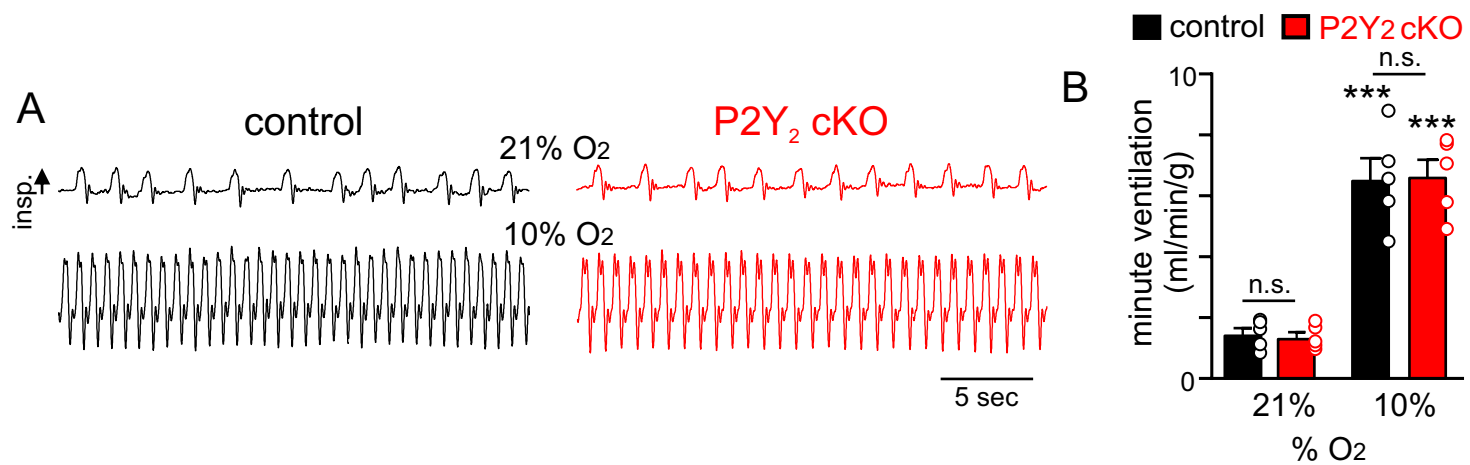

Figure 4- Figure Supplement 2

Supplement: supp [file elife_poa_e59499_Figure_4_figure_supplement_2.pdf › elife_poa_e59499_Figure_4_figure_supplement_2.pdf]

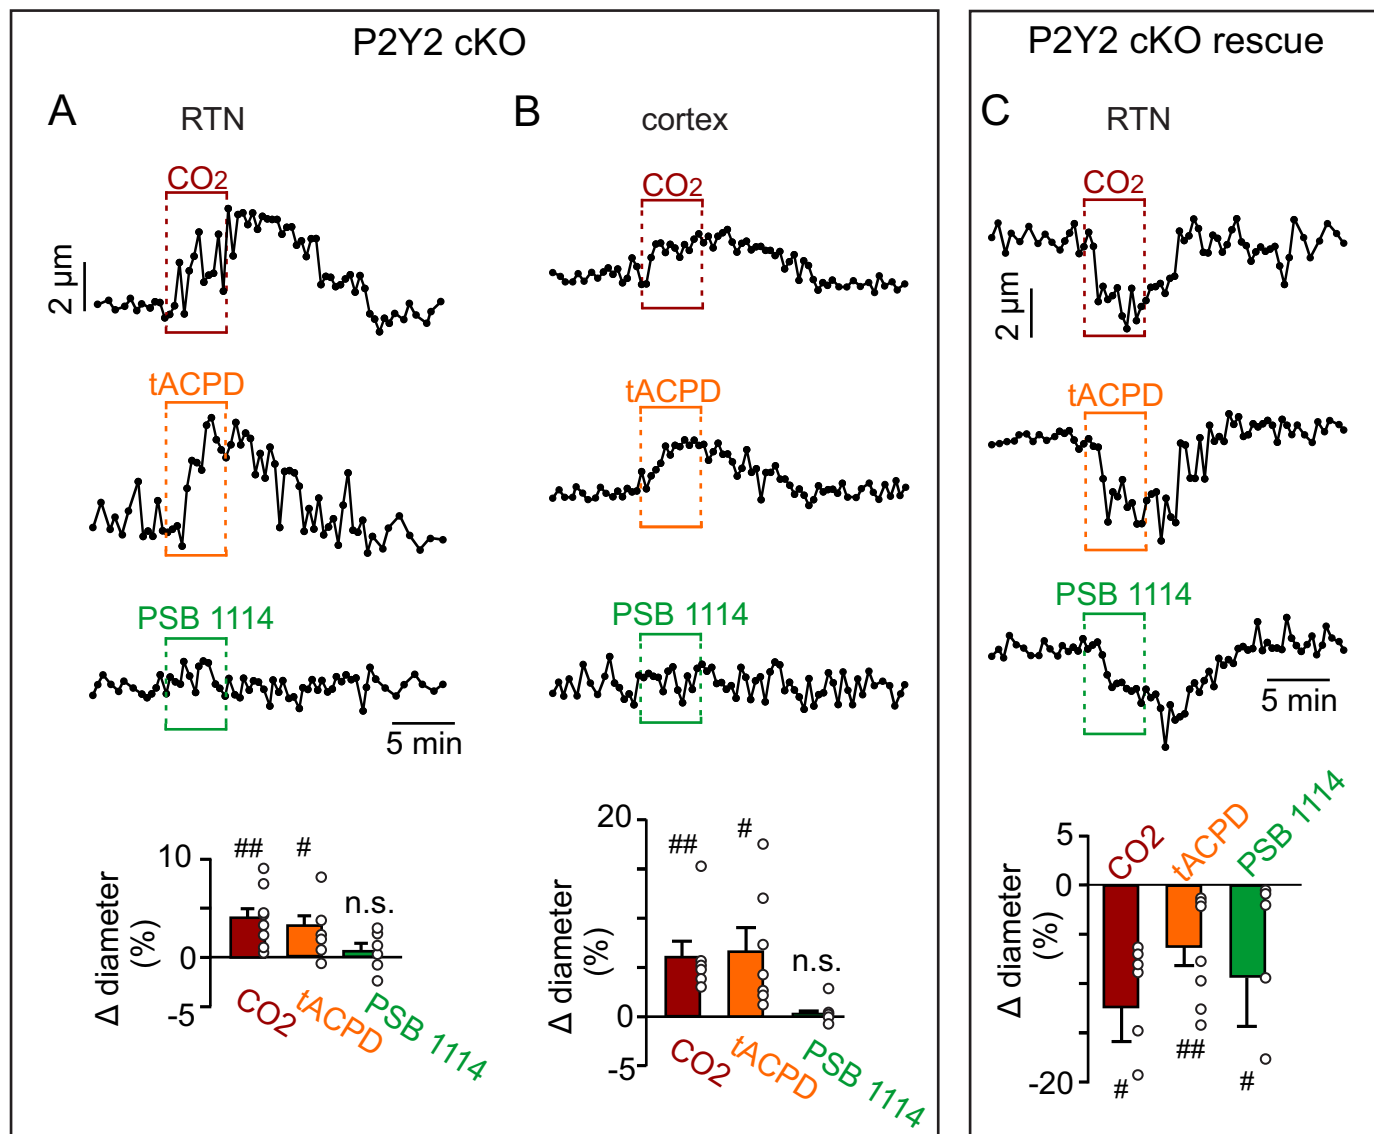

Supplement: supp [file elife_poa_e59499_Figure_4_figure_supplement_3.pdf › elife_poa_e59499_Figure_4_figure_supplement_3.pdf]

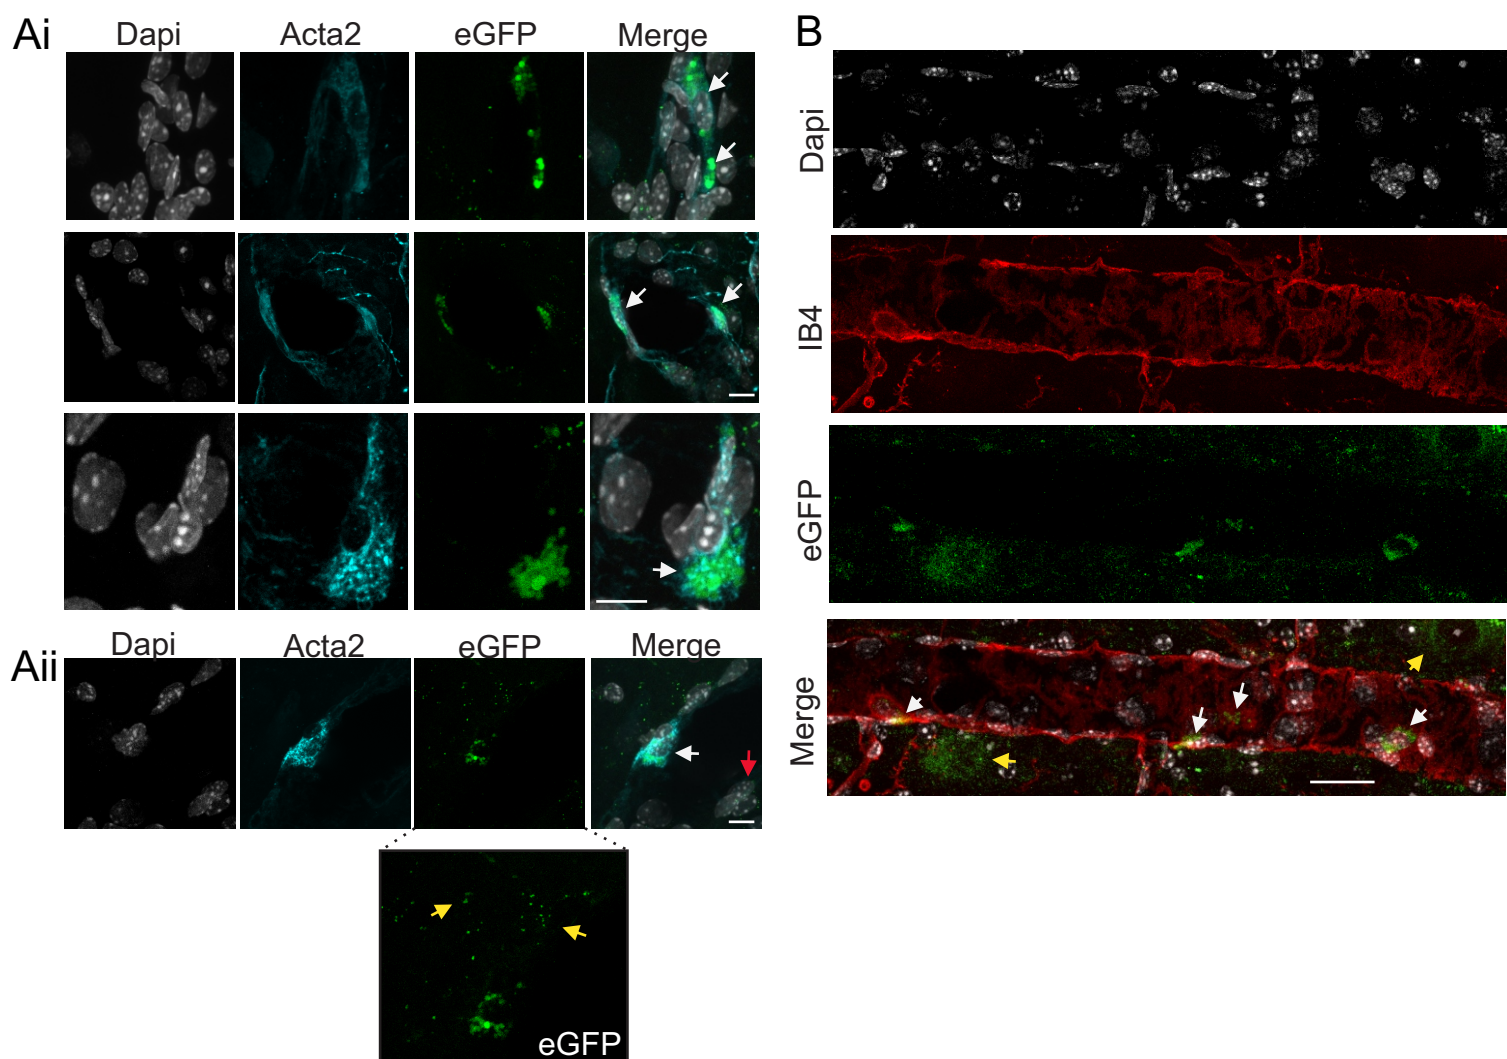

Figure 4- Figure Supplement 4

Supplement: supp [file elife_poa_e59499_Figure_4_figure_supplement_4.pdf › elife_poa_e59499_Figure_4_figure_supplement_4.pdf]

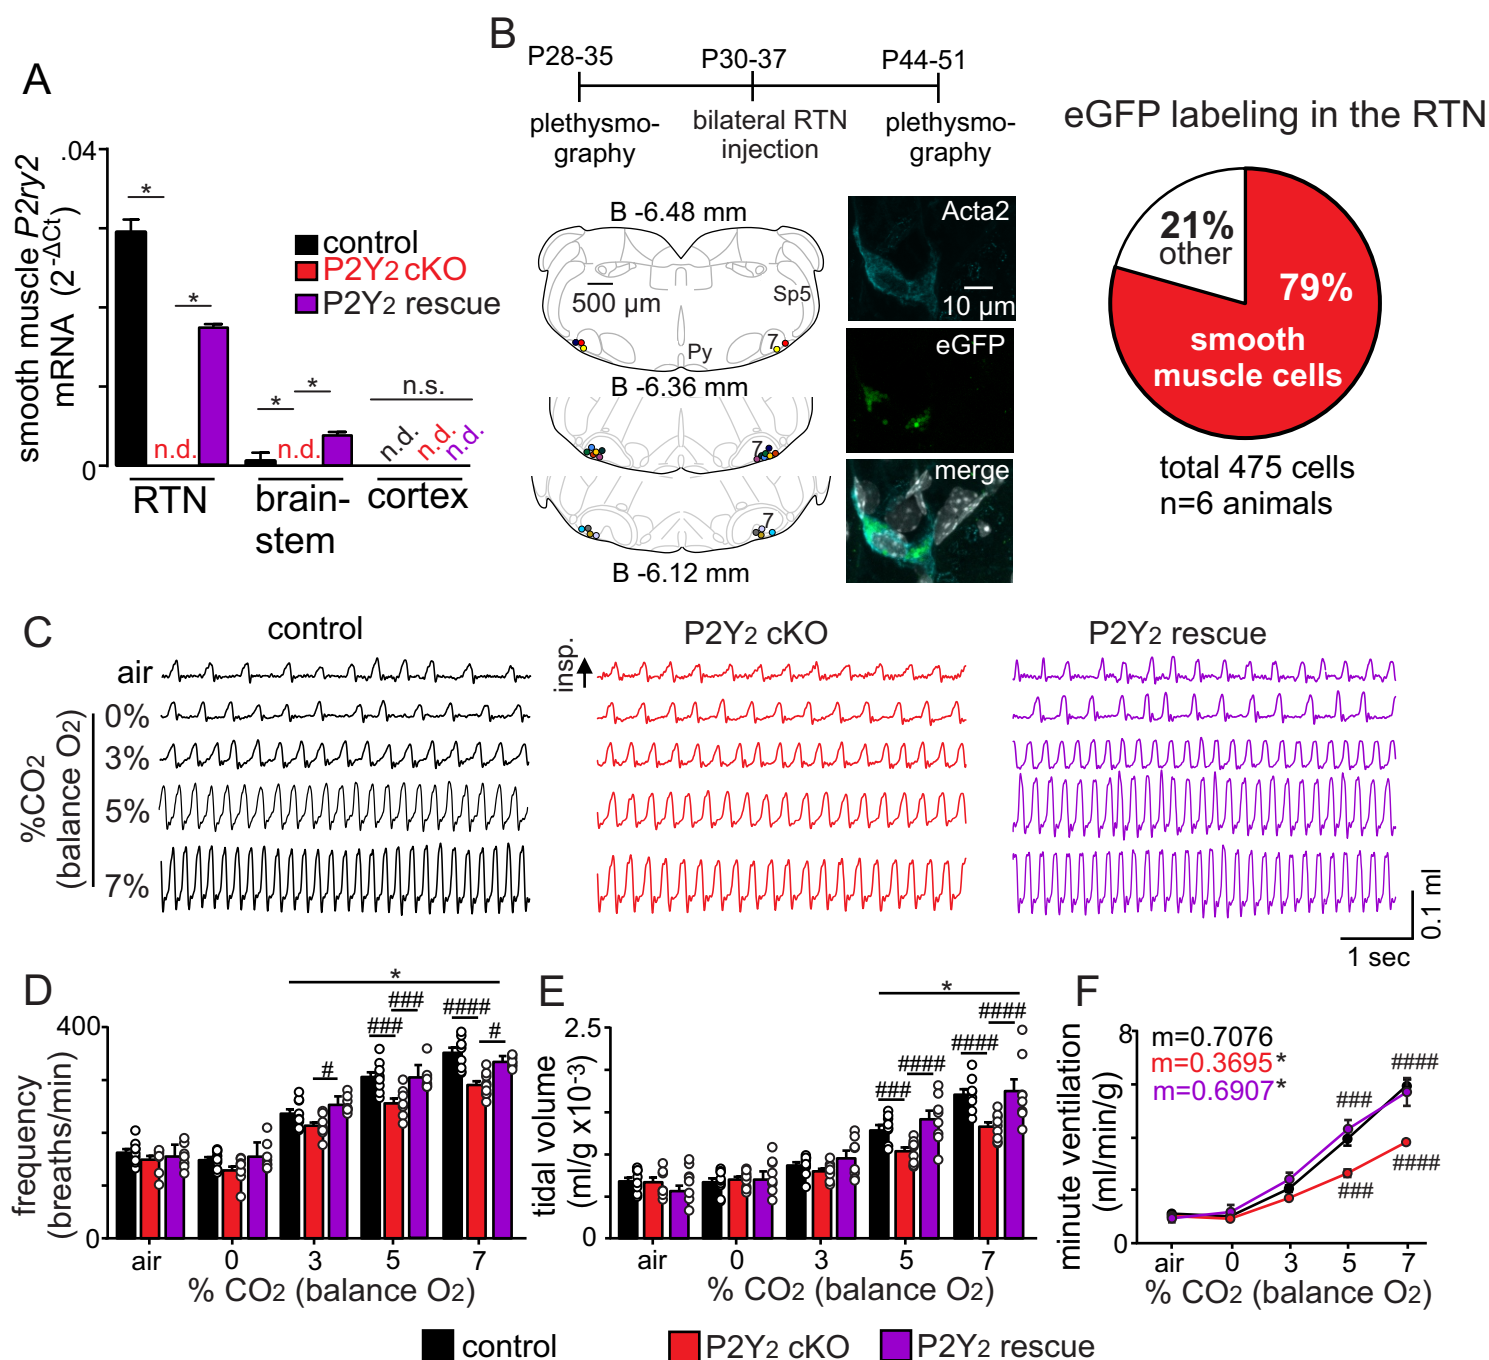

Figure 4-Figure supplement 5

Supplement: supp [file elife_poa_e59499_Figure_4_figure_supplement_5.pdf › elife_poa_e59499_Figure_4_figure_supplement_5.pdf]

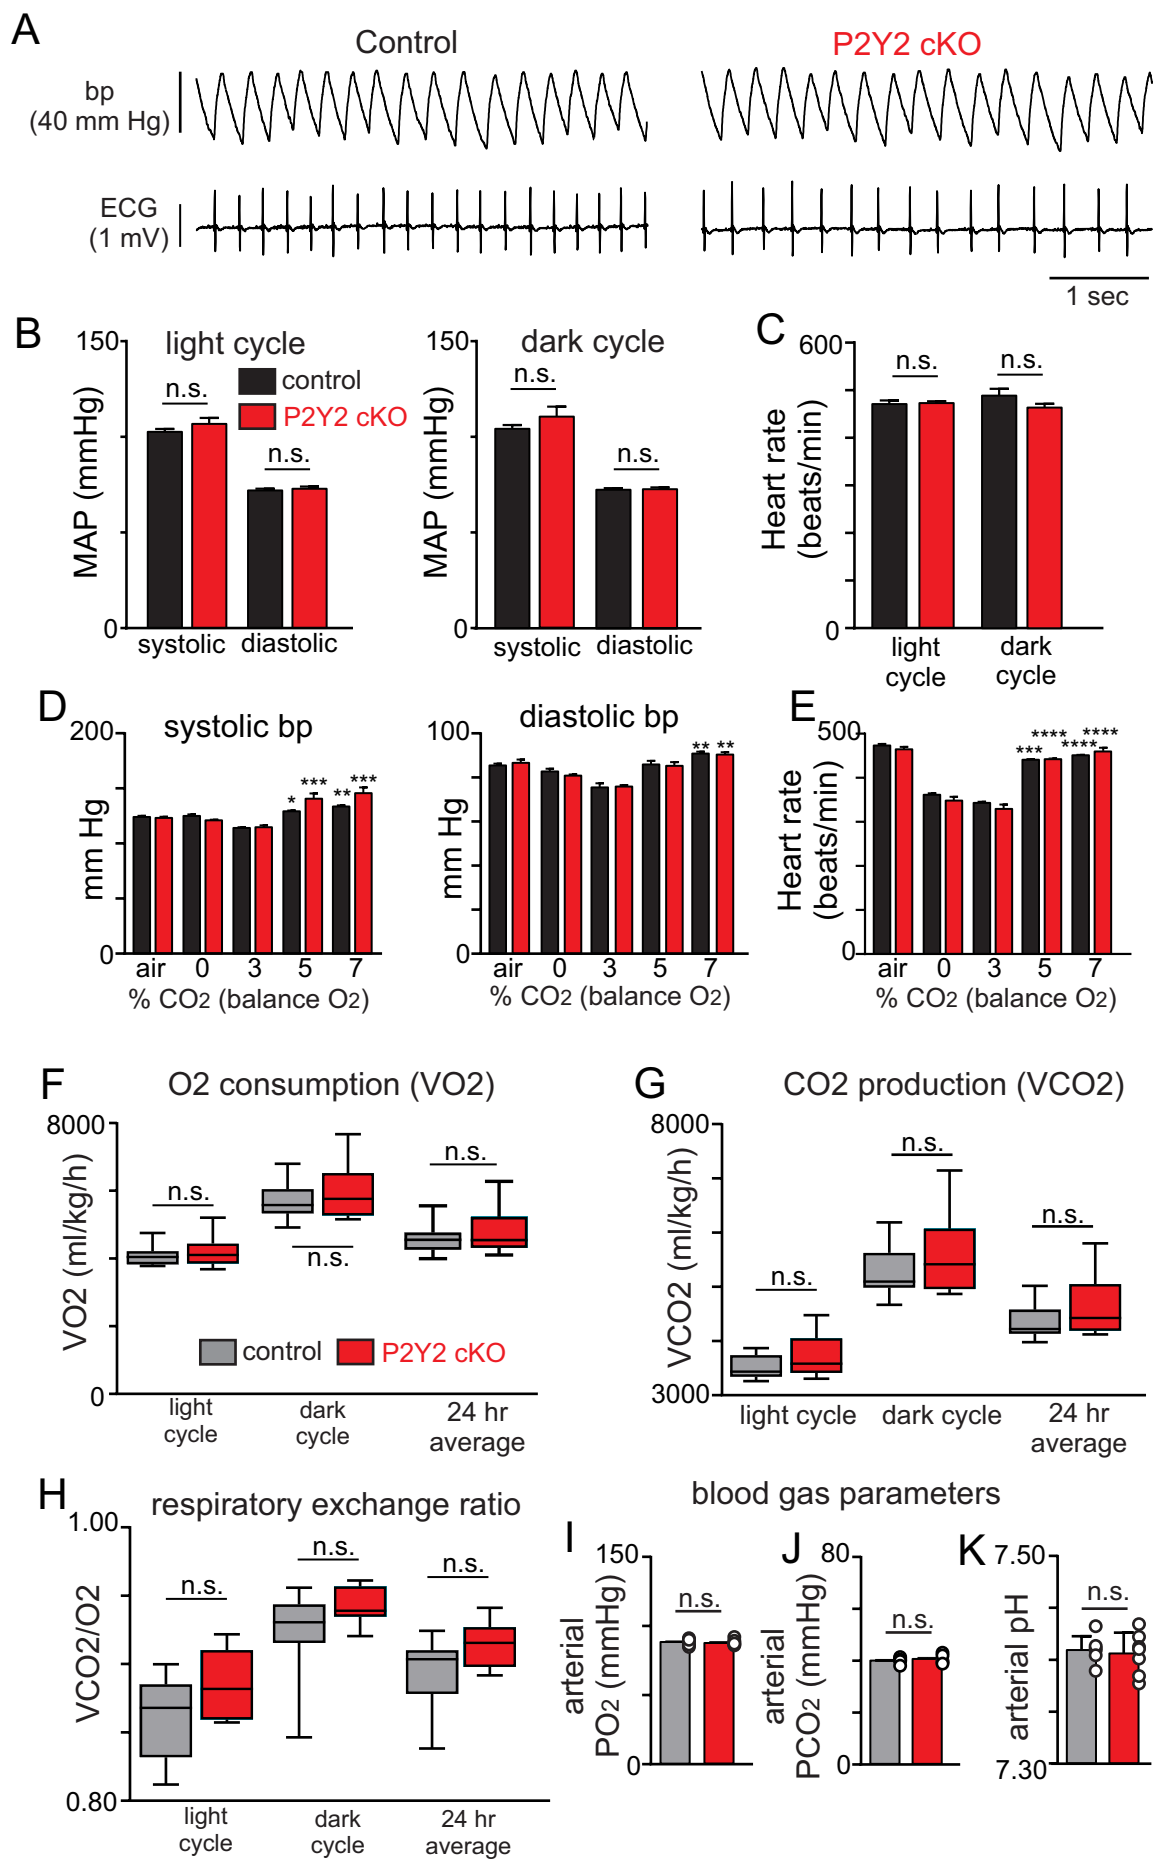

Figure 4- Figure Supplement 5

Supplement: supp [file elife_poa_e59499_Figure_4_figure_supplement_5.pdf › elife_poa_e59499_Figure_4_figure_supplement_5.pdf]
